# Supplementary material
Source: PubMed Central journal article supplement (PMC2687311)
Supplement: supp_75_11_3455__1.pdf [file supp_75_11_3455__1.pdf]

**Table S1:** Location and brief description of all of the sample sites examined in this study.

| Abbrev.               | Stream Name                           | Location                               | Description                                                                                                                |
|-----------------------|---------------------------------------|----------------------------------------|----------------------------------------------------------------------------------------------------------------------------|
| <b>Reefton area</b>   |                                       |                                        |                                                                                                                            |
| LA                    | Lankeys Creek                         | Lat. 42°8.865',<br>Long. 171°54.083'   | Pristine reference stream, just east of Reefton.                                                                           |
| MU                    | Murrays Creek                         | Lat. 42°7.973',<br>Long. 171°52.952'   | Mostly pristine, just east of Reefton. A few small mines present upstream.                                                 |
| DU                    | Devils Creek                          | Lat. 42°10.448',<br>Long. 171°52.646'  | Moderately impacted by abandoned Albion mines. At gate to Globe Mine.                                                      |
| GA                    | Garvey Creek                          | Lat. 42°9.675',<br>Long. 171°56.735'   | Highly impacted by large mine east of Reefton.                                                                             |
| WE                    | Wellman Creek                         | Lat. 42°8.865',<br>Long. 171°54.083'   | Highly impacted by large mine east of Reefton.                                                                             |
| <b>Denniston area</b> |                                       |                                        |                                                                                                                            |
| DR                    | Unnamed stream (Denniston Road)       | Lat. 41°44.382',<br>Long. 171°47.592'  | Pristine, with naturally low pH from humic and fulvic acids (a brownwater stream).                                         |
| RU                    | Rapid Creek                           | Lat. 41°45.219',<br>Long. 171°46.537'  | Pristine, with naturally low pH.                                                                                           |
| BF                    | Unnamed stream (Burnetts Face)        | Lat. 41°45.573',<br>Long. 171°48.473'  | Moderately impacted by abandoned mines.                                                                                    |
| WM                    | Unnamed stream (Whareatea mine)       | Lat. 41°46.118',<br>Long. 171°47.227'  | Moderately impacted by abandoned mines.                                                                                    |
| SWA                   | Unnamed stream (Sullivans West adit)  | Lat. 41°45.127',<br>Long. 171°46.474'  | Highly impacted from abandoned coal mines.                                                                                 |
| <b>Stockton area</b>  |                                       |                                        |                                                                                                                            |
| TW                    | Twins Creek                           | Lat. 41°38.317',<br>Long. 171°50.846'  | Pristine stream, with near neutral pH, south of Granity.                                                                   |
| BR                    | Bradley Creek                         | Lat. 41°38.317',<br>Long. 171°51.785'  | Pristine Stream, with near neutral pH.                                                                                     |
| PO                    | Portal Stream                         | Lat. 41°38.353',<br>Long. 171°452.271' | Highly impacted by abandoned mine above Millerton.                                                                         |
| PT                    | Packtrack Stream                      | Lat. 41°38.285',<br>Long. 171°52.452'  | Highly impacted by abandoned mines above Millerton.                                                                        |
| OB                    | Unnamed stream (Old Bathhouse)        | Lat. 41°38.257',<br>Long. 171°52.388'  | Highly impacted by abandoned mines above Millerton.                                                                        |
| NG                    | Ngakawau River                        | Lat. 41°36.627',<br>Long. 171°53.612'  | Highly impacted by active and abandoned mines, pH has been adjusted with addition of a lime slurry.                        |
| <b>Paparoa Ranges</b> |                                       |                                        |                                                                                                                            |
| NMC                   | Nine Mile Creek (Strongman mine area) | Lat. 42°21.001',<br>Long. 171°17.669'  | Highly impacted by abandoned Strongman Mine north of Greymouth. Site has naturally high pH (drains a limestone catchment). |
