# Supplementary material
Source: PubMed Central journal article supplement (PMC2687311)
Supplement: supp_75_11_3455__2.pdf [file supp_75_11_3455__2.pdf]

**Table S2.** Stream water quality parameters measured at each stream during April 2008. Inorganic mass (ash mass) on stream rocks was averaged from 5 randomly selected cobbles and reported per cm<sup>2</sup>.

| Stream | pH  | Water Temperature (°C) | Stream Depth (m) | Stream Width (m) | Stream Discharge (l s <sup>-1</sup> ) | Conductivity (µS cm <sup>-1</sup> ) | Inorganic mass (mg cm <sup>-2</sup> ) | Aluminium (mg l <sup>-1</sup> )† | Zinc (mg l <sup>-1</sup> ) † | Dissolved Reactive Phosphorus (µg l <sup>-1</sup> ) † | Dissolved Inorganic Nitrogen (µg l <sup>-1</sup> ) † |
|--------|-----|------------------------|------------------|------------------|---------------------------------------|-------------------------------------|---------------------------------------|----------------------------------|------------------------------|-------------------------------------------------------|------------------------------------------------------|
| OB     | 2.8 | 16.6                   | 0.18             | 1.62             | 36.6                                  | 1399                                | 0.46                                  | 56                               | 0.64                         | 339.6                                                 | 1831                                                 |
| PT     | 2.8 | 15.1                   | 0.12             | 0.32             | 5.1                                   | 1174                                | 0.12                                  | 34                               | 0.40                         | 45.5                                                  | 984                                                  |
| SWA    | 2.8 | 11.1                   | 0.17             | 4.31             | 54.2                                  | 948                                 | 0.68                                  | 14                               | 0.52                         | 75.5                                                  | 112                                                  |
| PO     | 2.9 | 16.7                   | 0.11             | 0.51             | 7.4                                   | 1079                                | 0.09                                  | 46                               | 0.44                         | 58.4                                                  | 1124                                                 |
| WE     | 3.3 | 9.9                    | 0.24             | 1.93             | 55.2                                  | 849                                 | 2.73                                  | 8.3                              | 0.89                         | 5.5                                                   | 189                                                  |
| WM     | 3.9 | 8.6                    | 0.14             | 1.08             | 15.4                                  | 82                                  | 0.49                                  | 0.4                              | 0.01                         | 3.1                                                   | 11                                                   |
| GA     | 4.0 | 10.2                   | 0.21             | 2.11             | 61.4                                  | 449                                 | 0.85                                  | 2.3                              | 0.15                         | 3.3                                                   | 1872                                                 |
| BF     | 4.1 | 9.0                    | 0.21             | 3.87             | 66.8                                  | 62                                  | 0.14                                  | 0.9                              | 0.04                         | 5.5                                                   | 40                                                   |
| RU     | 4.5 | 7.8                    | 0.19             | 3.11             | 41.1                                  | 27                                  | 0.05                                  | 0.1                              | 0.1                          | 2.6                                                   | 40                                                   |
| DU     | 4.5 | 9.1                    | 0.10             | 1.12             | 11.3                                  | 115                                 | 0.72                                  | 0.9                              | 0.0                          | 6.7                                                   | 17                                                   |
| DR     | 5.0 | 8.1                    | 0.08             | 0.41             | 6.9                                   | 22                                  | 0.05                                  | 0.1                              | 0.0                          | 7.9                                                   | 40                                                   |
| NG     | 5.7 | 9.1                    | 1.60*            | 30.0*            | 8000*                                 | 133                                 | 0.66                                  | 0.0                              | 0.1                          | 2.0                                                   | 134                                                  |
| TW     | 6.7 | 9.6                    | 0.15             | 1.21             | 16.7                                  | 103                                 | 0.05                                  | 0.1                              | 0.0                          | 2.0                                                   | 25                                                   |
| BR     | 7.1 | 10.6                   | 0.12             | 1.43             | 11.4                                  | 280                                 | 0.08                                  | 0.0                              | 0.0                          | 4.9                                                   | 51                                                   |
| MU     | 7.1 | 9.5                    | 0.26             | 2.89             | 88.2                                  | 77                                  | 0.05                                  | 0.1                              | 0.0                          | 9.0                                                   | 12                                                   |
| LA     | 7.4 | 9.6                    | 0.16             | 2.76             | 51.4                                  | 101                                 | 0.05                                  | 0.1                              | 0.0                          | 24.7                                                  | 14                                                   |
| NMC    | 8.3 | 16.8                   | 0.24             | 4.10             | 34.2                                  | 608                                 | 0.15                                  | 0                                | 0                            | 3.5                                                   | 88                                                   |

† Concentrations within filtered stream water. Dissolved inorganic nitrogen is the sum of concentrations of nitrate/nitrite nitrogen and ammoniacal nitrogen.

\*estimate
