# Supplementary material
Source: PubMed Central journal article supplement (PMC2687311)
Supplement: supp_75_11_3455__3.pdf [file supp_75_11_3455__3.pdf]

**Table S3.** Summary of identity of 16S rRNA clones identified from DNA extracts from a pH neutral (BR), acidic (DU) and very acidic (OB) stream using the universal primers PB36 and PB38. Clones were identified according to the closest match to named genera in the NCBI database.

| Genus                   | BR<br>(Neutral Stream) |                  | DU<br>(Acidic Stream) |                  | OB<br>(Very Acidic Stream) |                  | Phylum              |
|-------------------------|------------------------|------------------|-----------------------|------------------|----------------------------|------------------|---------------------|
|                         | No. of clones          | No. of sequences | No. of clones         | No. of sequences | No. of clones              | No. of sequences |                     |
| <i>Acidiphilium</i>     |                        |                  | 1                     | 1                |                            |                  | Alphaproteobacteria |
| <i>Acidocella</i>       |                        |                  | 3                     | 1                |                            |                  | Alphaproteobacteria |
| <i>Acidosphaera</i>     |                        |                  |                       |                  | 1                          | 1                | Alphaproteobacteria |
| <i>Afipia</i>           |                        |                  | 1                     | 1                |                            |                  | Alphaproteobacteria |
| <i>Beijerinckia</i>     |                        |                  | 1                     | 1                |                            |                  | Alphaproteobacteria |
| <i>Bradyrhizobium</i>   |                        |                  | 4                     | 3                |                            |                  | Alphaproteobacteria |
| <i>Caulobacter</i>      |                        |                  | 2                     | 2                |                            |                  | Alphaproteobacteria |
| <i>Defluviobacter</i>   | 1                      | 1                |                       |                  |                            |                  | Alphaproteobacteria |
| <i>Devosia</i>          | 3                      | 2                |                       |                  |                            |                  | Alphaproteobacteria |
| <i>Hyphomicrobium</i>   | 11                     | 6                | 1                     | 1                |                            |                  | Alphaproteobacteria |
| <i>Hyphomonas</i>       | 1                      | 1                |                       |                  |                            |                  | Alphaproteobacteria |
| <i>Kozakia</i>          |                        |                  | 1                     | 1                |                            |                  | Alphaproteobacteria |
| <i>Meythlosinus</i>     |                        |                  | 1                     | 1                |                            |                  | Alphaproteobacteria |
| <i>Nordella</i>         | 5                      | 2                |                       |                  |                            |                  | Alphaproteobacteria |
| <i>Pedomicrobium</i>    | 1                      | 1                |                       |                  |                            |                  | Alphaproteobacteria |
| <i>Phenyloacterium</i>  |                        |                  | 1                     | 1                |                            |                  | Alphaproteobacteria |
| <i>Phyllobacterium</i>  | 1                      | 1                |                       |                  |                            |                  | Alphaproteobacteria |
| <i>Pseudolabrys</i>     |                        |                  | 1                     | 1                |                            |                  | Alphaproteobacteria |
| <i>Rhodobacter</i>      | 6                      | 5                |                       |                  |                            |                  | Alphaproteobacteria |
| <i>Rhodobium</i>        | 1                      | 1                |                       |                  |                            |                  | Alphaproteobacteria |
| <i>Rhodopila</i>        |                        |                  |                       |                  | 1                          | 1                | Alphaproteobacteria |
| <i>Rhodovastum</i>      |                        |                  | 1                     | 1                |                            |                  | Alphaproteobacteria |
| <i>Sphingomonas</i>     | 4                      | 4                | 1                     | 1                |                            |                  | Alphaproteobacteria |
| <i>Acidovorax</i>       |                        |                  | 2                     | 2                |                            |                  | Betaproteobacteria  |
| <i>Aquamonas</i>        | 2                      | 1                |                       |                  |                            |                  | Betaproteobacteria  |
| <i>Bordetella</i>       | 1                      | 1                |                       |                  |                            |                  | Betaproteobacteria  |
| <i>Burkholderia</i>     | 1                      | 1                |                       |                  |                            |                  | Betaproteobacteria  |
| <i>Gallionella</i>      |                        |                  | 20                    | 4                | 1                          | 1                | Betaproteobacteria  |
| <i>Neisseria</i>        |                        |                  |                       |                  | 1                          | 1                | Betaproteobacteria  |
| <i>Polaromonas</i>      | 2                      | 2                | 4                     | 3                |                            |                  | Betaproteobacteria  |
| <i>Ralstonia</i>        | 1                      | 1                |                       |                  |                            |                  | Betaproteobacteria  |
| <i>Rhodoferax</i>       | 3                      | 2                |                       |                  |                            |                  | Betaproteobacteria  |
| <i>Thiomonas</i>        |                        |                  |                       |                  | 2                          | 1                | Betaproteobacteria  |
| <i>Variovorax</i>       |                        |                  | 2                     | 2                |                            |                  | Betaproteobacteria  |
| <i>Acetivibacterium</i> |                        |                  | 2                     | 1                | 2                          | 1                | Gammaproteobacteria |

|                            |    |    |    |    |    |    |                        |
|----------------------------|----|----|----|----|----|----|------------------------|
| <i>Alkalispirillum</i>     |    |    |    |    | 1  | 1  | Gamma                  |
| <i>Coxiella</i>            | 2  | 1  |    |    |    |    | Gamma                  |
| <i>Enterobacter</i>        | 1  | 1  |    |    |    |    | Gamma                  |
| <i>Gluconobacter</i>       |    |    | 2  | 1  |    |    | Gamma                  |
| <i>Legionella</i>          | 1  | 1  |    |    |    |    | Gamma                  |
| <i>Nevskia</i>             | 1  | 1  |    |    |    |    | Gamma                  |
| <i>Pseudomonas</i>         | 1  | 1  |    |    |    |    | Gamma                  |
| <i>Rhodanobacter</i>       |    |    |    |    | 1  | 1  | Gamma                  |
| <i>Serratia</i>            |    |    | 1  | 1  |    |    | Gamma                  |
| <i>Siderooxidans</i>       |    |    | 2  | 2  |    |    | Gamma                  |
| <i>Steriodibacter</i>      |    |    | 3  | 1  | 1  | 1  | Gamma                  |
| <i>Thiodictyon</i>         | 1  | 1  |    |    |    |    | Gamma                  |
| <i>Bacteriovorax</i>       |    |    | 1  | 1  |    |    | Delta                  |
| <i>Bdellovibrio</i>        |    |    | 1  | 1  |    |    | Delta                  |
| <i>Desulfobacca</i>        |    |    | 1  | 1  |    |    | Delta                  |
| <i>Desulfobacterium</i>    | 1  | 1  |    |    |    |    | Delta                  |
| <i>Desulfovibrio</i>       | 1  | 1  |    |    |    |    | Delta                  |
| <i>Geobacter</i>           |    |    | 1  | 1  | 1  | 1  | Delta                  |
| <i>Syntrophus</i>          |    |    | 2  | 2  |    |    | Delta                  |
| <i>Acidobacteria</i>       |    |    | 2  | 2  |    |    | Acidobacteria          |
| <i>Holophaga</i>           |    |    | 1  | 1  |    |    | Acidobacteria          |
| <i>Terriglobus</i>         |    |    | 5  | 1  | 1  | 1  | Acidobacteria          |
| <i>Acidimicrobium</i>      |    |    | 1  | 1  |    |    | Actinobacteria         |
| <i>Arthrobacter</i>        | 1  | 1  |    |    |    |    | Actinobacteria         |
| <i>Edaphobacter</i>        | 1  | 1  | 3  | 1  | 2  | 1  | Actinobacteria         |
| <i>Ferrimicrobium</i>      |    |    |    |    | 1  | 1  | Actinobacteria         |
| <i>Iamibacter</i>          | 1  | 1  | 1  | 1  |    |    | Actinobacteria         |
| <i>Sanguibacter</i>        | 1  | 1  |    |    |    |    | Actinobacteria         |
| <i>Solirubrobacter</i>     | 1  | 1  |    |    |    |    | Actinobacteria         |
| <i>Cytophaga</i>           |    |    | 1  | 1  |    |    | Bacteriodetes          |
| <i>Flavsolibacter</i>      | 2  | 2  |    |    |    |    | Bacteriodetes          |
| <i>Niastella</i>           |    |    | 1  | 1  |    |    | Bacteriodetes          |
| <i>Deinococcus</i>         | 3  | 2  |    |    |    |    | Deinococci             |
| <i>Bacillus</i>            | 1  | 1  |    |    |    |    | Firmicutes             |
| <i>Clostridium</i>         | 3  | 3  |    |    |    |    | Firmicutes             |
| <i>Exiguobacterium</i>     | 5  | 3  |    |    |    |    | Firmicutes             |
| <i>Trigonella</i>          |    |    |    |    | 1  | 1  | Firmicutes             |
| <i>Vagococcus</i>          | 1  | 1  |    |    |    |    | Firmicutes             |
| <i>Leptospirillum</i>      |    |    |    |    | 6  | 2  | Nitrospirae            |
| <i>Thermodesulfovibrio</i> |    |    | 1  | 1  |    |    | Nitrospirae            |
| <i>Gemmata</i>             | 2  | 2  | 1  | 1  | 3  | 2  | Planctomycetes         |
| <i>Isosphaera</i>          | 1  | 1  |    |    | 1  | 1  | Planctomycetes         |
| <i>Nostocoida</i>          | 1  | 1  | 1  | 1  |    |    | Planctomycetes         |
| Uncultured planctomycete   | 1  | 1  |    |    |    |    | Planctomycetes         |
| <i>Treponema</i>           |    |    | 1  | 1  |    |    | Spirochaetes           |
| <i>Elusimicrobium</i>      |    |    | 1  | 1  |    |    | Unclassified bacterium |
| Uncultured bacterium       | 3  | 3  | 2  | 2  | 3  | 3  | Uncultured bacterium   |
| <i>Calothrix</i>           | 1  | 1  |    |    |    |    | cyanobacteria          |
| <i>Leptolyngbya</i>        | 1  | 1  |    |    |    |    | cyanobacteria          |
| <i>Nostoc</i>              |    |    | 1  | 1  |    |    | cyanobacteria          |
| <i>Phormidium</i>          | 4  | 2  |    |    |    |    | cyanobacteria          |
| <i>Calypogeia</i>          |    |    | 1  | 1  |    |    | eukaryota              |
| <i>Chlamydomonas</i>       | 1  | 1  |    |    |    |    | eukaryota              |
| <i>Chlorella</i>           |    |    |    |    | 4  | 3  | eukaryota              |
| <i>Euglena</i>             |    |    |    |    | 8  | 3  | eukaryota              |
| <i>Klebsormidium</i>       | 1  | 1  | 1  | 1  | 14 | 3  | eukaryota              |
| <i>Leptosporoceros</i>     |    |    |    |    | 1  | 1  | eukaryota              |
| <i>Navicula</i>            |    |    | 1  | 1  | 17 | 3  | eukaryota              |
| <i>Nitzschia</i>           |    |    |    |    | 4  | 1  | eukaryota              |
| <i>Thalassiosira</i>       |    |    |    |    | 4  | 2  | eukaryota              |
| Total                      | 89 | 71 | 89 | 59 | 82 | 38 |                        |
